# Supplementary material
Source: MDPI journal article supplement (https://www.mdpi.com/2673-7655/4/1/6)
Supplement: s1 [file s1]

## Supplementary Tables

**Table S1.** The analysis of variance for protein (Pro), fat (Fat), fiber (Fib), ash (Ash), carbohydrate (Carb), calcium (Ca), potassium (K), magnesium (Mg), phosphorus (P), iron (Fe), and zinc (Zn) of green leaves, inflorescences, and grains for three varieties of quinoa.

| Parameter | Source          | DF | F value | Pro > F    |
|-----------|-----------------|----|---------|------------|
| Pro       | Var             | 2  | 0.30    | 0.75       |
|           | Treatment       | 2  | 406     | <0.0001*** |
|           | Var x Treatment | 4  | 0.43    | 0.79       |
| Fat       | Var             | 2  | 15.85   | 0.0002***  |
|           | Treatment       | 2  | 583     | <0.0001*** |
|           | Var x Treatment | 4  | 4.16    | 0.02*      |
| Fib       | Var             | 2  | 12.74   | 0.0005***  |
|           | Treatment       | 2  | 3883    | <0.0001*** |
|           | Var x Treatment | 4  | 5.84    | 0.004**    |
| Ash       | Var             | 2  | 6.26    | 0.01*      |
|           | Treatment       | 2  | 2060    | <0.0001*** |
|           | Var x Treatment | 4  | 2.72    | 0.07       |
| Carb      | Var             | 2  | 1.19    | 0.33       |
|           | Treatment       | 2  | 936     | <0.0001*** |
|           | Var x Treatment | 4  | 0.82    | 0.53       |
| Ca        | Var             | 2  | 1.87    | 0.19       |
|           | Treatment       | 2  | 222     | <0.0001*** |
|           | Var x Treatment | 4  | 4.06    | 0.02*      |
| K         | Var             | 2  | 4.58    | 0.03*      |
|           | Treatment       | 2  | 1134    | <0.0001*** |
|           | Var x Treatment | 4  | 2.91    | 0.05*      |
| Mg        | Var             | 2  | 3.13    | 0.07       |
|           | Treatment       | 2  | 145     | <0.0001*** |
|           | Var x Treatment | 4  | 2.17    | 0.11       |
| P         | Var             | 2  | 0.23    | 0.80       |
|           | Treatment       | 2  | 32.89   | <0.0001*** |
|           | Var x Treatment | 4  | 2.15    | 0.12       |
| Fe        | Var             | 2  | 9.69    | 0.002**    |
|           | Treatment       | 2  | 0.70    | 0.51       |
|           | Var x Treatment | 4  | 9.10    | 0.0005***  |
| Zn        | Var             | 2  | 1.84    | 0.19       |
|           | Treatment       | 2  | 97.81   | <0.0001*** |
|           | Var x Treatment | 4  | 7.67    | 0.100**    |

\* Significant difference at  $p < 0.05$ , \*\* Significant difference at  $p < 0.01$ , \*\*\* Significant difference at  $p < 0.001$ .

**Table S2.** Eigenvalue, variability, and cumulative values.

|               | PC1   | PC2   |
|---------------|-------|-------|
| Eigenvalue    | 8.75  | 1.52  |
| Variability % | 72.94 | 12.70 |
| Cumulative %  | 72.94 | 85.64 |
